# 1 **Illness duration and symptom profile in a large cohort of** 2 **symptomatic UK school-aged children tested for SARS-** 3 **CoV-2**

4  
5 Erika Molteni PhD<sup>1\*</sup>, Carole H. Sudre PhD<sup>1,2,3\*</sup>, Liane S. Canas PhD<sup>1</sup>, Sunil S. Bhopal PhD<sup>4</sup>,  
6 Robert C. Hughes MPH MB ChB<sup>5</sup>, Michela Antonelli PhD<sup>1</sup>, Benjamin Murray MSc<sup>1</sup>, Kerstin  
7 Kläser MSc<sup>1</sup>, Eric Kerfoot PhD<sup>1</sup>, Liyuan Chen MSc<sup>1</sup>, Jie Deng PhD<sup>1</sup>, Christina Hu BA<sup>6</sup>,  
8 Somesh Selvachandran MEng<sup>6</sup>, Kenneth Read BSc<sup>6</sup>, Joan Capdevila Pujol PhD<sup>6</sup>, Alexander  
9 Hammers PhD<sup>1,7</sup>, Tim D. Spector PhD<sup>8</sup>, Sebastien Ourselin PhD<sup>1</sup>, Claire J. Steves PhD<sup>8</sup>,  
10 Marc Modat PhD<sup>1</sup>, Michael Absoud PhD<sup>9,10</sup>, Emma L. Duncan PhD<sup>8,10</sup>.

- 11  
12 1. School of Biomedical Engineering & Imaging Sciences, King's College London,  
13 London, UK.  
14 2. MRC Unit for Lifelong Health and Ageing, Department of Population Health Sciences,  
15 University College London, London, UK.  
16 3. Centre for Medical Image Computing, Department of Computer Science, University  
17 College London, London, UK.  
18 4. Population Health Sciences Institute, Faculty of Medical Sciences, Newcastle  
19 University, Newcastle upon Tyne, Tyne and Wear, UK.  
20 5. Department of Population Health, Faculty of Epidemiology & Population Health,  
21 London School of Hygiene & Tropical Medicine, Keppel Street, London, UK.  
22 6. Zoe Global, London, UK.  
23 7. King's College London & Guy's and St Thomas' PET Centre, London, UK.  
24 8. Department of Twin Research and Genetic Epidemiology, King's College London,  
25 London, UK.  
26 9. Children's Neurosciences, Evelina London Children' Hospital, St Thomas' Hospital,  
27 King's Health Partners, Academic Health Science Centre, London, UK.  
28 10. Department of Women and Children's Health, Faculty of Life Sciences and Medicine,  
29 School of Life Course Sciences, King's College London, London, UK.

30 \* Equal contribution

## 33 **Corresponding Author:**

34 Emma L. Duncan, MBBS, FRACP, FRCP, PhD

NOTE: This preprint reports new research that has not been certified by peer review and should not be used to guide clinical practice.

35 Department of Twin Research and Genetic Epidemiology, and Department of Women and  
36 Children's Health  
37 King's College London,  
38 WC2R 2LS, Strand, London, UK.  
39 emma.duncan@kcl.ac.uk

40

41 **Key words**

42 Long COVID; ongoing symptomatic COVID-19; post-COVID-19 syndrome; SARS-CoV-2  
43 prolonged infection; school-children; paediatric COVID-19.

44

45 **Word count:** 4649 without abstract; 5012 with abstract.

46 **Number of Tables:** 2

47 **Number of Figures:** 4

48 **Number of Supplementary Tables:** 5

49 **Number of Supplementary Figures:** 6

50

## 51 **Research in context**

52

53 **Evidence before this study:** SARS-CoV-2 in children is usually asymptomatic or manifests  
54 as a mild illness of short duration. Concerns have been raised regarding prolonged illness in  
55 children, with no clear resolution of symptoms several weeks after onset, as is observed in  
56 some adults. How common this might be in children, the clinical features of such prolonged  
57 illness in children, and how it might compare with illnesses from other respiratory viruses  
58 (and with general population prevalence of these symptoms) is unclear.

59

60 **Added value of this study:** We provide systematic description of COVID-19 in UK school-  
61 aged children. Our data, collected in a digital surveillance platform through one of the largest  
62 UK citizen science initiatives, show that long illness duration after SARS-CoV-2 infection in  
63 school-aged children does occur, but is uncommon, with only a small proportion of children  
64 experiencing illness duration beyond four weeks; and the symptom burden in these children  
65 usually decreases over time. Almost all children have symptom resolution by eight weeks,  
66 providing reassurance about long-term outcomes. Additionally, symptom burden in children  
67 with long COVID was not greater than symptom burden in children with long illnesses due to  
68 causes other than SARS-CoV-2 infection.

69

70 **Implications of all the available evidence:**

71 Our data confirm that COVID-19 in UK school-aged children is usually of short duration and  
72 of low symptom burden. Some children do experience longer illness duration, validating their  
73 experience; however, most of these children usually recover with time. Our findings highlight  
74 that appropriate resources will be necessary for any child with prolonged illness, whether  
75 due to COVID-19 or other illness. Our study provides timely and critical data to inform  
76 discussions around the impact and implications of the pandemic on paediatric healthcare  
77 resource allocation.

78

79

## 80 **Abstract**

81

### 82 **Background**

83 In children, SARS-CoV-2 is usually asymptomatic or causes a mild illness of short duration.  
84 Persistent illness has been reported; however, its prevalence and characteristics are  
85 unclear. We aimed to determine illness duration and characteristics in symptomatic UK  
86 school-aged children tested for SARS-CoV-2 using data from the COVID Symptom Study,  
87 the largest UK citizen participatory epidemiological study to date.

88

### 89 **Methods**

90 Data from 258,790 children aged 5-17 years were reported by an adult proxy between 24  
91 March 2020 and 22 February 2021. Illness duration and symptom profiles were analysed for  
92 all children testing positive for SARS-CoV-2 for whom illness duration could be determined,  
93 considered overall and within younger (5-11 years) and older (12-17 years) groups. Data  
94 from symptomatic children testing negative for SARS-CoV-2, matched 1:1 for age, gender,  
95 and week of testing, were also assessed.

96

### 97 **Findings**

98 1,734 children (588 younger, 1,146 older children) had a positive SARS-CoV-2 test result  
99 and calculable illness duration within the study time frame. The commonest symptoms were  
100 headache (62.2%) and fatigue (55.0%). Median illness duration was six days (vs. three days  
101 in children testing negative), and was positively associated with age ( $r_s$  0.19,  $p < 1.e-4$ ) with  
102 median duration of seven days in older vs. five days in younger children.

103

104 Seventy-seven (4.4%) children had illness duration  $\geq 28$  days (LC28), more commonly  
105 experienced by older vs. younger children (59 (5.1%) vs. 18 (3.1%),  $p = 0.046$ ). The  
106 commonest symptoms experienced by these children were fatigue (84%), headache (80%)  
107 and anosmia (80%); however, by day 28 the symptom burden was low (median, two). Only  
108 25 (1.8%) of 1,379 children experienced symptoms for  $\geq 56$  days. Few children (15 children,  
109 0.9%) in the negatively-tested cohort experienced prolonged symptom duration; however,  
110 these children experienced greater symptom burden (both throughout their illness and at day  
111 28) than children positive for SARS-CoV-2.

112

### 113 **Interpretation**

114 Some children with COVID-19 experience prolonged illness duration. Reassuringly,  
115 symptom burden in these children did not increase with time, and most recovered by day 56.  
116 Some children who tested negative for SARS-CoV-2 also had persistent and burdensome

117 illness. A holistic approach for all children with persistent illness during the pandemic is  
118 appropriate.

119

## 120 **Authors contributions**

121 EM, CHS, LSC, ELD performed the analyses  
122 BM, EK, LC, JD, MM performed data extraction and curation  
123 EM, SSB, RCH, AH, MA, ELD wrote the manuscript  
124 CH, SSe, KR, JCP developed the data collection system  
125 TDS, SO, CJS conceived the CSS and obtained funds  
126 MM, SO, CJS, ELD coordinated this research  
127 All the authors critically reviewed the manuscript

128

## 129 **Declaration of interests**

130 CH, SS, KR, JCP are employees of Zoe Global Ltd.  
131 All other authors have nothing to declare.

132

## 133 **Role of Funding Source**

134 This work is supported by the Wellcome Engineering and Physical Sciences Research  
135 Council (EPSRC) Centre for Medical Engineering at King's College London (WT  
136 203148/Z/16/Z) and the UK Department of Health via the National Institute for Health  
137 Research (NIHR) comprehensive Biomedical Research Centre (BRC) award to Guy's & St  
138 Thomas' NHS Foundation Trust in partnership with King's College London and King's  
139 College Hospital NHS Foundation Trust. Investigators also received support from the  
140 Medical Research Council (MRC) and British Heart Foundation, the UK Research and  
141 Innovation London Medical Imaging & Artificial Intelligence Centre for Value Based  
142 Healthcare, and the Wellcome Flagship Programme (WT213038/Z/18/Z). EM is funded by  
143 an MRC Skills Development Fellowship Scheme at KCL. CHS is supported by an  
144 Alzheimer's Society Junior Fellowship (AS-JF-17-011). ZOE Global supported all aspects of  
145 building and running the app and service to all users worldwide.

146

## 147 **Ethics Committee Approval**

148 Ethics approval for this study was granted by the KCL Ethics Committee (reference LRS-  
149 19/20-18210); all participants (here, proxy-reporting adults) provided consent.

150

## 151 Introduction

152 To date, severe acute respiratory syndrome-related coronavirus 2 (SARS-CoV-2) has  
153 caused >120 million cases of Coronavirus Disease 2019 (COVID-19) and 2.5 million deaths  
154 globally.<sup>1</sup> In adults, SARS-CoV-2 causes a predominantly respiratory illness<sup>2</sup> of median  
155 duration 11 days.<sup>3</sup> In contrast, children with SARS-CoV-2 infection are often asymptomatic  
156 (43%-68%<sup>4</sup>) or have relatively mild symptoms, most commonly cough and fever;<sup>4,5</sup> and life-  
157 threatening illness or death is rare. 1,575 children (aged 0-17 years) hospitalised in England  
158 from 19 March 2020 to 3 March 2021 tested positive for SARS-CoV-2 (though COVID-19  
159 may not necessarily have been the reason for hospitalisation<sup>6</sup>) and 29 deaths due to COVID-  
160 19 were reported in children and young people across the UK from 1 March 2020 to 29  
161 January 2021 (0.59% of estimated all-cause deaths in this age group during this period<sup>7</sup>).  
162 The pandemic has also seen a new rare condition, multisystem inflammatory syndrome in  
163 children (MIS-C), typically presenting 2-4 weeks after acute SARS-CoV-2 infection.<sup>8</sup>

164  
165 Some adults with SARS-CoV-2 infection experience prolonged illness duration ("Long  
166 COVID").<sup>9,10</sup> The King's College London (KCL) COVID Symptom Study (CSS),<sup>11</sup> involving  
167 >4.5 million UK participants, showed that 13.3% adults with COVID-19 had symptoms for  $\geq 4$   
168 weeks (LC28) and 4.5%  $\geq 8$  weeks (LC56).<sup>3</sup> Whether some children may also experience  
169 prolonged illness duration after COVID-19<sup>10</sup> and, if so, how this compares with other  
170 illnesses, is unclear.

171  
172 In September 2020, coinciding with UK schools re-opening, governance for CSS data usage  
173 was extended to allow analysis of data from children (i.e., individuals aged <18 years). The  
174 UK subsequently experienced further waves of the pandemic, during which time there was  
175 widespread testing availability for individuals experiencing fever, cough and/or anosmia, in  
176 contrast to the limited access during the first wave when testing was mostly restricted to  
177 individuals presenting to hospital.<sup>12,13</sup> Moreover, stay-at-home directives and school closures  
178 over the 2020-21 UK winter resulted in unusually low circulation of viruses such as influenza,  
179 adenovirus, and respiratory syncytial virus.<sup>14</sup> However, symptom overlap meant many  
180 individuals (adults and children) with respiratory illnesses other than COVID-19 were tested  
181 for SARS-CoV-2.

182  
183 Here we report illness duration, individual symptom prevalence and duration, and symptom  
184 burden in UK school-aged children testing positive for SARS-CoV-2, and provide similar data

185 for symptomatic children testing negative during the same period. We also present  
186 prevalence and characteristics of long COVID in children.  
187

## 188 **Methods**

189 Data were acquired from CSS, through a mobile application launched jointly by Zoe Global  
190 Ltd. and KCL on 24 March 2020.<sup>11</sup> Briefly, individuals report through a smartphone  
191 application their symptomatology, any SARS-CoV-2 testing, vaccination, and health care  
192 access. Symptom assessment includes direct questions about specific symptoms  
193 (Supplementary Table 1) and free-text entry.<sup>11</sup> Adult contributors can also proxy-report for  
194 other persons (children, elderly relatives, etc.). The relationship between contributor and  
195 proxy-reported individual(s) is not solicited and there is no data linkage between them.  
196 Children aged 16-17 years can use the app independently or be proxy-reported by an adult.  
197

198 UK data from school-aged children (aged 5-17 years) were available from app launch to 22  
199 February 2021, which latter date corresponds to eight weeks after peak UK SARS-CoV-2  
200 positive specimen date.<sup>15</sup> The cohort was analysed overall and within two age groups:  
201 younger children, aged 5-11 years (UK primary school-aged children) and older children,  
202 aged 12-17 years (UK secondary school-aged children).  
203

204 Aligning with our previous publications in adults,<sup>3,11</sup> children were considered symptomatic of  
205 COVID-19 if proxy-reported with relevant symptoms<sup>11</sup> (Supplementary Table),<sup>16</sup> with first  
206 symptom(s) presenting within a timeframe of one week before and two weeks after infection  
207 confirmation (either SARS-CoV-2 polymerase chain reaction or lateral flow test). Illness  
208 duration was calculated from first symptom(s) (having been previously asymptomatic) until  
209 recovery (return to asymptomatic state or, if proxy-reporting ceased prior to an asymptomatic  
210 report, the final proxy-report). Individuals reported as asymptomatic but subsequently re-  
211 reported with symptoms within one week of last symptomatic report were considered still  
212 unwell from initial presentation (i.e., having relapsing/remitting illness); calculation of illness  
213 duration included these short asymptomatic periods. Children with reporting gaps longer  
214 than one week between symptomatic reports were excluded. Individual symptom prevalence  
215 and duration were assessed, with individual symptom duration calculated as time between  
216 first and last report for that symptom. Symptom burden was calculated as the number of  
217 different symptoms reported at least once over a defined timeframe (during first week, first  
218 28 days,  $\geq 28$  days until end of illness, and over entire illness duration). Consistent with our  
219 previous adult study,<sup>3</sup> we termed illness with symptoms  $\geq 28$  days as LC28; and  $\geq 56$  days,

220 LC56. Thus, by virtue of census dates LC28 could only be determined in proxy-reported  
221 children whose symptoms commenced on or before 24 January 2021, and for LC56 on or  
222 before 29 December 2020 (the peak positive specimen date<sup>15</sup>). Symptom profiles were also  
223 assessed in children presenting for hospital-based care (presenting to the emergency  
224 department or admitted to hospital), where hospital presentation followed symptom  
225 commencement.

226

227 Several direct symptom questions were added to the app on 4 November 2020  
228 (Supplementary Table 2). Data from these additional questions are presented in  
229 Supplementary Figure 1 but were not included in illness duration or symptom burden  
230 calculations for the main analysis.

231

232 Free-text reporting was also possible across the entire period. Free-text data were divided  
233 into themes using frequency of descriptive words, with each item within the themes  
234 independently scrutinised by two clinicians (MAb, ELD) to ensure appropriate categorisation.  
235 Individuals reporting free-text symptoms within those themes were then counted. Free-text  
236 data are reported here as descriptive statistics (Supplementary Table 3) and were not  
237 included in calculating illness duration or symptom burden. Free-text data were also  
238 searched for specific neurological terms (e.g., weakness, difficulties with balance, paralysis,  
239 seizures, fits, convulsions, paroxysms, tics) and symptoms potentially affecting attention,  
240 behaviour, learning, and/or school performance (e.g., anxiety, low mood, and irritability).  
241 Symptoms already assessed by direct question (Supplementary Table 1) were excluded  
242 from free-text searching, to avoid duplication.

243

244 Symptom profile and duration were also assessed in children testing negative for SARS-  
245 CoV-2 using a randomly selected control cohort (matched 1:1 for age, gender, and week of  
246 testing), and compared to children testing positive, analysed identically.

247

248 Proxy-reporting density was defined as the number of episodes of proxy-reporting over the  
249 illness duration, and persistence as proxy-reporting until return to healthy state.

250

251 Prevalence data for common winter circulating viruses were obtained from the Public Health  
252 England weekly national influenza and COVID-19 surveillance report.<sup>14</sup>

253

254 Data are presented using descriptive statistics. Results are presented as median and  
255 interquartile ranges. Due to rarity (with most percentages <5%) confidence intervals were  
256 calculated using Poisson distribution. Comparisons of data between groups used Wilcoxon



257 signed-rank test or Chi-squared/Fisher's exact tests, as appropriate. Spearman correlation  
258 testing was used to assess correlation of illness duration with age.

259

## 260 **Results**

261 Recruitment is outlined in Figure 1. Overall, 258,790 children aged 5-17 years were proxy-  
262 reported between 24 March 2020 and 22 February 2021. A positive SARS-CoV-2 test result  
263 was reported in 6,975 children, of whom 1,912 (666 younger, 1,246 older) children had a  
264 calculable illness duration and requisite proxy-report logging. As only 36 of these children  
265 had illness onset prior to 1 September 2020 (which date corresponded to return-to-school),  
266 and with limited community access to testing early in the UK pandemic,<sup>13</sup> analyses were  
267 restricted to children with illness onset after 1 September 2020. Illness onset had to  
268 commence on or before 24 January 2021 for illness duration  $\geq 4$  weeks to be evident, per  
269 LC28 definition;<sup>3</sup> 1,734 (588 younger, 1,146 older) children were proxy-logged within the  
270 requisite timeframe. Similarly, 1,379 (445 younger; 934 older) children had symptoms  
271 commencing on or before 29 December 2020, allowing illness duration  $\geq 8$  weeks to be  
272 evident, per LC56 definition.<sup>3</sup>

273

274 Among 16- and 17-year-old individuals, 29,047 self-logged data (447 reporting testing  
275 positive) compared to 32,271 proxy-reported (1,197 reported as testing positive). Illness  
276 duration could only be calculated in ten self-logged versus 381 proxy-logged 16- and 17-  
277 year-olds; and concurrent self-reporting and proxy-reporting could not be excluded. Thus,  
278 only proxy-reported data are presented here.

279

### 280 ***Illness in children who tested positive for SARS-CoV-2.***

281

282 The median illness duration in children with COVID-19 was six [IQR 3;11] days (Table 1).  
283 Illness duration was shorter in younger compared with older children (five [IQR 2;9] vs.  
284 seven [IQR 3;12] days, Mann-Whitney U test  $p < 1.e-5$ ); and age correlated with illness  
285 duration ( $r_s$  0.19,  $p < 1.e-4$ ).

286

287 Individual symptom prevalence and duration are shown in Table 2, Figure 2, and Figure 3.  
288 Overall, the most reported symptoms were headache (reported in 62.2% [55.1% younger,  
289 65.9% older] children) and fatigue (55.0% [43.9% younger, 60.7% older] children).  
290 Subsequent symptoms ranked by frequency were in younger children: fever (43.7%), sore  
291 throat (36.2%), abdominal pain (27.7%), and persistent cough (24.7%); in older children:

292 sore throat (51.0%), anosmia (48.3%), fever (34.6%), and persistent cough (26.0%). During  
293 first week of illness, the median symptom burden was three [IQR 2;6] overall (three [IQR 2;5]  
294 in younger, four [IQR 2;6] in older children).

295

296 Sixteen younger and 21 older children testing positive for SARS-CoV-2 subsequently  
297 attended hospital. Symptom profiles of these children compared with children managed in  
298 the community are shown in Supplementary Figure 2. No formal statistical comparisons  
299 were undertaken between hospital and community cases, given the low numbers of hospital  
300 attendees.

301

### 302 ***Long illness duration in children who tested positive for SARS-CoV-2.***

303

304 Overall, 77 (18 younger, 59 older) of 1,734 children (4.4% [95% CI 3.5-5.5]) had illness  
305 duration  $\geq 28$  days, meeting LC28 definition. The median symptom burden in these children  
306 was six symptoms [IQR 4;8] reported at least once during first week of illness, and eight  
307 symptoms [IQR 6;9] reported at least once over the entire illness duration. However, by day  
308 28, median symptom burden was low, at two [IQR 1;4] symptoms (younger children: three  
309 [IQR 1;4]; older children, one [IQR 1;3]). The commonest symptoms experienced by these  
310 children over their entire illness were fatigue (experienced by 84.4%), headache (77.9%),  
311 anosmia (77.9%) and sore throat (74.0%). Figure 4 is a heat map of symptom profile and  
312 progression over the first 28 days in children with LC28.

313

314 Twenty-five of 1,379 children (1.8% [95% CI 1.2-2.7]) had symptoms for  $\geq 56$  days, meeting  
315 LC56 definition.<sup>3</sup> The median symptom burden in these children was six [IQR 4;8] symptoms  
316 reported at least once during the first week, and eight [IQR 6;10] symptoms reported at least  
317 once over the entire illness duration. The commonest symptoms experienced by these  
318 children over their entire illness were anosmia (84.0%), headache (80.0%), sore throat  
319 (80.0%) and fatigue (76.0%).

320

321 Older children were more likely to manifest symptoms  $\geq 28$  days compared with younger  
322 children (59 (5.1%) of 1146 older children vs. 18 (3.1%) of 588 younger children, Chi-  
323 squared two-tail test  $p=0.046$ ). This was not significantly different in the smaller number of  
324 children with illness duration  $\geq 56$  days (19 (2.0%) of 934 older children vs. six (1.3%) of 445  
325 younger children, Fisher's exact test  $p=0.52$ ).

326

### 327 ***Symptom Reporting from Additional Questions (added 4 November 2020) and Free*** 328 ***Text Analysis***

329

330 Considering data from questions added to the app on 4 November 2020, the most reported  
331 symptom was rhinorrhoea (45.8% younger, 53.5% older children) then sneezing (36.3%  
332 younger, 36.6% older children) (Supplementary Figure 1), with similar prevalence in children  
333 with LC28 (51.4% rhinorrhoea, 48.9% sneezing) considered over their entire illness.

334

### 335 ***Potential neurological symptoms***

336

337 As mentioned, headache and fatigue were the commonest symptoms in children testing  
338 positive for SARS-CoV-2, overall and in each age group (Figure 2). Dizziness  
339 (undifferentiated between light-headedness and vertigo) was reported in 84 (14.3%) younger  
340 and 300 (26.2%) older children (median duration two [IQR 1;4] and two [IQR 1;5] days  
341 respectively). Symptoms of confusion (encompassing confusion, disorientation, and  
342 drowsiness) were reported in 15 (2.6%) younger and 81 (7.1%) older children (median  
343 duration two [IQR 1;2] and one [IQR 1;3] day(s) respectively). No formal statistical  
344 comparisons of these symptoms in children with shorter or longer illness duration were  
345 made, given low prevalence of these symptoms in children with LC28 (Figure 4).

346

347 Considering questions added on 4 November 2020 (Supplementary Table 2), with smaller  
348 sample size due to shorter timeframe, 'brain fog' was reported for 44 (8.7%) of 507 younger  
349 and 188 (20.2%) of 932 older children (median duration one day [IQR 1;4] and two days  
350 [IQR 1;5] respectively). Low mood was reported for 40 (8.0%) younger and 145 (15.6%)  
351 older children (median duration two [IQR 1;3.5] and two [IQR 1;4] days, respectively)  
352 (Supplementary Figure 1).

353

354 Free-text searching for specific neurologic symptoms disclosed very few reports of  
355 weakness (two children) or tics (one child). No severe neurological manifestations (paralysis,  
356 ataxia, epileptic seizures, fits, convulsions, paroxysms) were reported (Supplementary Table  
357 3). Irritability (three children), emotional difficulties (two children), and behavioural difficulties  
358 (one child) were reported rarely; impaired attention and concentration were not reported.

359

### 360 ***Illness in symptomatic children who tested negative for SARS-CoV-2.***

361

362 15,597 symptomatic children (8,761 younger, 6,836 older children) tested for SARS-CoV-2  
363 but with a negative result, were proxy-reported at least once weekly within the requisite time  
364 frame and with calculable illness duration. Demographic details of the randomly selected  
365 matched control cohort of 1,734 children are shown in Table 1. Median illness duration in

366 these children was three [IQR 2;7] days (younger children three [IQR 2;7] days; older  
367 children four [IQR 2;7] days), significantly shorter than for children testing positive for SARS-  
368 CoV-2 (Wilcoxon signed rank test  $p < 1.e-5$ ). The individual symptom duration is shown in  
369 Supplementary Figure 3 and prevalence in Supplementary Table 4. The most frequently  
370 reported symptoms over their entire illness were in younger children: sore throat (46.6%),  
371 headache (38.8%), fever (30.4%), fatigue (26.9%), and abdominal pain (24.7%); and in older  
372 children: sore throat (60.6%), headache (48.8%), fatigue (37.2%), fever (20.4%) and  
373 persistent cough (20.6%).

374

### 375 ***Long illness duration in children who tested negative for SARS-CoV-2.***

376

377 Few children with a negative SARS-CoV-2 test had illness duration  $\geq 28$  days (15 of 1,734  
378 children; 0.9%; 95% CI [0.5-1.4]), which was lower than for children testing positive  
379 considered overall (Chi-squared 2-tail test,  $p < 1.e-10$ ) and by age group (younger children:  
380 three (0.5%) vs. 18 (3.1%); Fisher's exact test:  $p = 0.001$ ; older children, 12 (1.1%) vs. 59  
381 (5.1%); Fisher's exact test:  $p = 0.001$  and  $p < 1.e-8$ ). Symptom profile of these children over  
382 their first 28 days of illness is shown in Supplementary Figure 4. However, older children  
383 testing negative for SARS-CoV-2 with illness duration  $\geq 28$  days had a greater symptom  
384 burden than was experienced by children with LC28, both at  $\geq 28$  days (Supplementary  
385 Figure 5) and over their entire illness duration (Supplementary Figure 6) ( $p = 0.005$  and  
386  $p = 0.025$  respectively, Mann-Whitney-U tests).

387

### 388 ***Proxy-reporting density***

389

390 Overall, proxy-reporting was assiduous for all children. Proxy-reporting density (number of  
391 logging episodes/illness duration in days) was significantly higher in children with a negative  
392 test for SARS-CoV-2, compared to children with a positive test (younger children: 1 [IQR  
393 0.68;1] vs. 0.89 [IQR 0.6;1]; older children 1 [IQR 0.67;1] vs. 0.8 [IQR 0.57;1]), noting the  
394 shorter illness duration in children with a negative test.

395

### 396 ***Proxy-reporting perseverance***

397

398 Proxy-reporting until healthy was higher in children testing negative compared with children  
399 testing positive (1,674 of 1,734 [96.5%] vs. 1,551 of 1,734, [89.4%], Chi-squared 2-tail test  
400  $p < 1.e-15$ ). Amongst all 1,734 children testing positive, logging ceased in 183 children prior to  
401 a healthy report (22 children with illness duration  $\geq 28$  days, 161  $< 28$  days). In children with  
402 illness duration  $\geq 28$  days, proxy-reporting continued until a healthy report in 71.4% [55/77].

403 However, the remaining 22 children had already had symptoms for  $\geq 28$  days and thus fulfil  
404 the definition of LC28. In children with illness duration  $< 28$  days, a healthy report was  
405 received for 90.3% [1496/1657]. For the remaining 161 children, median symptom burden at  
406 last report was two [IQR 1;3]; and proxy-reporting usually ceased early in illness (logging  
407 cessation rates: 11.3% of children with illness duration  $< 10$  days; 5.5%  $\geq 10$  days). Thus, for  
408 children for whom proxy-reporting ceased prior to a healthy report, we have assumed that  
409 cessation corresponded to illness resolution (i.e., that proxy-reporting stopped because the  
410 child had recovered) and illness duration calculated accordingly.

411  
412 We considered the impact of this assumption. Excluding all children testing positive but for  
413 whom a healthy report was not logged, median illness duration in the remaining 1,551 was  
414 unchanged (6 days [IQR 3;11]) and LC28 prevalence was 3.5% [55/1551], within the  
415 confidence intervals [3.5-5.5] for LC28 using data from the entire cohort. Excluding only the  
416 161 children with [assumed] short symptoms but including all children with LC28 (regardless  
417 of receipt of healthy report), LC28 prevalence was 4.9% (77/1,573 children), again within the  
418 confidence intervals.

419  
420 In children with a negative SARS-CoV-2 test, logging ceased in 60 children prior to a healthy  
421 report (four of 15 children with long illness duration, 56 of 1,719 children with [assumed]  
422 short illness duration).

423  
424 As there was no data linkage between proxy-reported individual(s) and contributor, we  
425 cannot comment whether concurrent illness of family members affected proxy-reporting  
426 density or perseverance.

## 427 **Discussion**

428 In this large study of UK school-aged children, we have shown that symptomatic SARS-CoV-  
429 2 infection in children is usually of short duration, with median illness duration of six days  
430 (compared to eleven days in adults<sup>3</sup>) and with low symptom burden. Prolonged illness  
431 duration can occur but is infrequent (4.4%  $\geq 28$  days; 1.8%  $\geq 56$  days), lower than observed in  
432 adults using the same disease definitions (in adults: prevalence of LC28, 13.3% and LC56,  
433 4.5%).<sup>3</sup> Age correlated with illness duration (overall, and in children with illness duration  $\geq 28$   
434 days), consistent with our previous findings in adults.<sup>3</sup>

435  
436 Similar to adults,<sup>3</sup> the commonest symptoms in children with COVID-19 were headache  
437 (62.2%) and fatigue (55.0%) (Table 2, Figure 2). A meta-analysis of studies including both

438 community-based and hospitalized children with COVID-19 identified fever (47%) and cough  
439 (42%) as the commonest symptoms; however, headache and fatigue were only assessed in  
440 half the contributing cohorts.<sup>4</sup> In our cohort, fever was reported for 37.7% and persistent  
441 cough in 25.5%. Anosmia (including anosmia and dysosmia) was common (39.6% overall),  
442 and higher than observed in a small study of adolescents aged 10-19 years with 'mild to  
443 moderate' COVID-19 (here, anosmia: 24.1%),<sup>17</sup> noting that anosmia was one of the core  
444 symptoms determining access to testing in the UK during our study period.

445

446 In children with illness duration  $\geq 28$  days, by day 28 symptom burden was low (median, two).  
447 Fatigue was proxy-reported at some stage in almost all (84.4%) of these children (Figure 4,  
448 Supplementary Figure 6). Fatigue has been reported as the commonest symptom of long  
449 COVID in many adult studies, although prevalence varies. In our own adult study, fatigue  
450 was almost universal in LC28 (97.7% at some stage during their illness);<sup>3</sup> other adult studies  
451 have reported persistence of fatigue as 53.1% at 60 days;<sup>18</sup> and 52.3% at 10 weeks.<sup>19</sup>

452

453 Few large-scale epidemiological studies have been undertaken to provide normative data of  
454 prevalence and persistence of headache and fatigue in the general paediatric population.  
455 Regarding headache, a systematic review of 38 unselected population-based studies in  
456 individuals aged  $< 20$  years reported ~60% were "prone to headache".<sup>20</sup> A random sample of  
457 2,165 school children aged 5-15 years reported 1,166 (66%) had headaches over the  
458 previous year.<sup>21</sup> Regarding fatigue, a study of 2,936 children found 129 (4.4%) had "more  
459 than a few days of disabling fatigue".<sup>22</sup> Prevalence of chronic fatigue syndrome ("disabling  
460 fatigue lasting  $> 3$  months...where no other cause for the fatigue could be established") was  
461 1% of children aged 11-16 years in a study from three English secondary schools;<sup>23</sup> and  
462 prevalence of "chronic disabling fatigue" ("fatigue lasting  $> 6$  months associated with absence  
463 from full-time school or that had prevented...[participation] in activities") in the Avon  
464 Longitudinal Study was 1.5% and 2.2% in children aged 13 and 16 years respectively.<sup>24</sup>  
465 Considering fatigue after viral infection, median illness duration after Epstein-Barr virus in  
466 symptomatic university students was ten days (mean 17, range 3-66 days), with fatigue  
467 persisting for a median of 15.5 days.<sup>25</sup> These studies indicate the wide range of prevalence  
468 of these symptoms in paediatric populations generally.

469

470 Lack of contemporaneous data comparing illness duration and symptom profiles after  
471 infection with different viruses also complicates contextualisation of COVID-19 in children. A  
472 preprint paper comparing data from 55,270 children/adolescents with COVID-19 (3,693 of  
473 whom were hospitalized) with a non-contemporaneous cohort of 1,952,693 children with  
474 influenza during 2017-19 (hospitalised numbers unclear) suggested that dyspnoea, anosmia,

475 and gastrointestinal tract symptoms were more common in children with COVID-19 than in  
476 children with influenza.<sup>26</sup> However, symptoms and overall illness duration were only reported  
477 as present or absent at 30 days in both groups, preventing more granular comparisons.

478

479 A strength of our study is our comparison of contemporaneous illness profiles of  
480 symptomatic children testing positive vs. negative for SARS-CoV-2, matched for age,  
481 gender, and week of testing. Children testing positive had longer median illness duration (six  
482 days vs. three days in children testing negative); and were more likely to have illness  
483 duration  $\geq 28$  days (4.4% vs. 0.9%). However, some children testing negative also had illness  
484 duration  $\geq 28$  days, and these children had a higher symptom count both over their entire  
485 illness duration and at day 28, acknowledging here that our sample size is small. We  
486 considered whether some of these children might have false negative results. However,  
487 there is no evidence that sensitivity and specificity of SARS-CoV-2 testing differ in children  
488 compared with adults, noting sensitivity for PCR SARS-CoV-2 testing of  $\sim 95\%$ .<sup>27</sup> The  
489 symptom profiles of these children (Supplementary Data) suggest some differences  
490 compared with children testing positive, though this could not be assessed statistically.  
491 Relevantly, prevalence of non-SARS-CoV-2 respiratory viruses (influenza A, influenza B,  
492 parainfluenza, adenovirus, rhinovirus, and respiratory syncytial virus) were unusually low  
493 over the 2020-21 UK winter,<sup>14,28,29</sup> with the exception of the rhinovirus peak commonly  
494 observed in September with return-to-school.<sup>14</sup> With relaxation of personal protection and  
495 social distancing, these illnesses are likely to return towards more usual (i.e., higher)  
496 incidences in future UK winters. Our data highlight that other illnesses may also have a  
497 protracted and burdensome course in children: this needs to be considered in post-  
498 pandemic service delivery planning.

499

500 Short and long-term effects of COVID-19 on school performance and learning have been a  
501 matter of concern.<sup>30</sup> In our cohort, neither attentional problems nor memory complaints nor  
502 anxiety were reported. Isolated cases of low mood and irritability were consistent with  
503 previously reported figures in the school-aged healthy population.<sup>31</sup> Our data do not support  
504 anecdotal reports of weakness and seizures as common features in children with COVID-19,  
505 whether of short or long illness duration; and no severe neurological symptoms were  
506 reported. However, symptom persistence from any illness can cause low mood, with adverse  
507 long-term outcomes including school refusal and separation anxiety.<sup>32</sup> Although self-  
508 reporting adults could participate in specific questions regarding mental health, these data  
509 could not be proxy-reported; this limits our ability to assess mental health comprehensively  
510 in children during the pandemic, whether testing positive or negative for SARS-CoV-2.

511

512 In considering our data relative to other sources, the UK Office for National Statistics (ONS)  
513 conducted a round of SARS-CoV-2 testing (irrespective of symptoms) from 2-10 December  
514 2020 (i.e., prior to the UK peak), in 7,089 pupils drawn from 121 schools (41 primary, 80  
515 secondary); positive tests were reported in 0.94% of primary school pupils and 0.99% of  
516 staff, and in secondary schools 1.22% of pupils and 1.64% of staff. However, the ONS  
517 warned that their conclusions might not have general validity, as there was deliberate  
518 oversampling of schools that had higher infection rates early after return-to-school.<sup>33</sup>  
519 Moreover, these figures do not capture fluctuations as the pandemic progressed. In our  
520 dataset integrating data across the pandemic, 6,975 (2.7%) of 258,790 of proxy-reported  
521 children had a positive test (2.3% of younger, 3.7% of older children), noting that: a) testing  
522 was only available for symptomatic individuals, and rarely during the first wave; and b)  
523 proxy-reporting was voluntary and through a COVID-19 study app, with its (adult) user base  
524 over-representative of females, white background, and above-average socioeconomic status  
525 compared with the general UK population.<sup>12</sup> Further, we cannot characterise regional  
526 variability, as geographic information was unavailable for many participants.

527  
528 We considered the proportion of all UK school-aged children testing positive for SARS-CoV-  
529 2 proxy-reported in our study. Different UK countries report data for children within different  
530 time periods and different age groups (e.g., often including young adults aged 18-19 years  
531 and preschool-aged children) (Supplementary Table 5). Conservatively, our study represents  
532 ~1-2% of UK school-aged children testing positive during the pandemic.

533  
534 The most recent ONS data (released April 2021) estimated 9.8% of children aged 2-11 years  
535 and 13.0% of children aged 12-16 years experiencing ongoing symptoms five weeks after a  
536 positive SARS-CoV-2 testing, with 7.4% and 8.2% respectively still reporting symptoms at 12  
537 weeks.<sup>34</sup> These figures were a reduction compared with previous ONS estimates in January  
538 2021 (e.g., from 12.9% to 9.8% in children aged 2-11 years).<sup>34,35</sup> The ONS has reported a  
539 control group (defined as never symptomatic, never tested, never self-isolated, and never a  
540 contact of anyone testing positive), with 'baseline' symptom rates (not otherwise parsed) of  
541 2% in children aged 2-11 years and 1.7% in children aged 12-16 years.<sup>34,35</sup> There is limited  
542 published detail of ONS methodology.

543  
544 Part of the disparity between our LC28 prevalence in children and the ONS figures may be  
545 that the ONS required two consecutive asymptomatic visits to define illness end: thus,  
546 children with asymptomatic periods >1 week between symptoms would be captured by ONS  
547 but not by our study. Notably, the ONS' sensitivity analysis of the impact of defining illness  
548 end to a single asymptomatic visit markedly lowered their prevalence estimates, especially



549 for illness >12 weeks (from 13.7% to 0.9%<sup>34</sup>), more consistent with our results. Additionally,  
550 ONS estimates use current and recalled data collected in the first week of each month,  
551 whereas our app-based data were collected in real time with high proxy-reporting density  
552 and persistence. Our data concurs with a small Australian study reporting 171 young  
553 children testing positive for SARS-CoV-2 (median age three years [IQR 1;8]), 151 of whom  
554 were followed for 3-6 months: twelve (8%) children (median age, two years) had symptoms  
555 3-8 weeks after initial presentation (most commonly, cough and/or fatigue); all returned to  
556 baseline health by study end.<sup>36</sup>

557  
558 Our study is part of one of the largest citizen-scientist initiatives ever in the UK. We  
559 leveraged our previously published methodologies assessing illness duration and symptom  
560 profiling, including long COVID assessment.<sup>3</sup> Our data census points allowed us to capture  
561 all children with illness duration  $\geq 8$  weeks who presented before the UK peak positive  
562 specimen date, and by ensuring symptom presentation concurred with test timing we could  
563 attribute symptoms to illness defined by contemporaneous test results. We avoided bias  
564 from limited test availability early in the pandemic by restricting analyses to start from 1  
565 September 2020. We acknowledge there were still some blocks to testing access<sup>37</sup> –  
566 specifically, individuals were required to have fever, cough, or anosmia which symptom list  
567 was largely informed by adult symptomatology and might not capture some common  
568 paediatric manifestations of COVID-19 (e.g., abdominal pain, reported in 4% of paediatric  
569 cases<sup>4</sup> and in 27.8% of our younger children). Similarly, direct questions asked through the  
570 app were largely informed by research in adults. The free-text entries did not suggest  
571 common symptoms unique to paediatric populations; however, we did not undertake a  
572 formal qualitative analysis of free-text data given (a) its *ad hoc* collection and (b) the  
573 potential bias arising from introduction of additional direct questions from 4 November 2020  
574 (i.e., once a symptom was directly asked, it was unlikely to be reported as free-text). We also  
575 acknowledge that symptoms were proxy-reported rather than directly ascertained; however,  
576 this is common in clinical assessment of children, particularly younger children.

## 577 **Conclusions**

578 Our national study provides the first systematic description of COVID-19 in symptomatic  
579 school-aged children tested for SARS-CoV-2. Our data show that long illness duration after  
580 COVID-19 is uncommon; however, a small proportion of children do have prolonged illness  
581 duration and persistent symptoms, validating these children's experiences. Our LC56 data  
582 provide reassurance regarding longer outcome for these children. The symptom burden in  
583 children testing negative for SARS-CoV-2 but with long illness duration highlights that

584 allocation of appropriate resources will be necessary for any child with prolonged illness,  
585 whether from SARS-CoV-2 infection or not. Our study provides timely and critical data to  
586 inform discussions around the impact and implications of the pandemic on UK paediatric  
587 healthcare resource allocation.

#### 588 **Data sharing**

589 Data collected in the COVID Symptom Study smartphone application are being shared with  
590 other health researchers through the UK National Health Service-funded Health Data  
591 Research UK (HDRUK) and Secure Anonymised Information Linkage consortium, housed in  
592 the UK Secure Research Platform (Swansea, UK). Anonymised data are available to be  
593 shared with researchers according to their protocols in the public interest  
594 (<https://web.www.healthdatagateway.org/dataset/fddcb382-3051-4394-8436-b92295f14259>).

595  
596

---

## 597 References

598

599

- 600 1 World Health Organization (WHO). WHO Coronavirus (COVID-19) Dashboard.  
601 <https://covid19.who.int>. 2021; published online May 10.
- 602 2 Xie Y, Wang Z, Liao H, Marley G, Wu D, Tang W. Epidemiologic, clinical, and  
603 laboratory findings of the COVID-19 in the current pandemic: Systematic review and  
604 meta-analysis. *BMC Infectious Diseases*. 2020; **20**. DOI:10.1186/s12879-020-05371-  
605 2.
- 606 3 Sudre C, Murray B, Varsavsky T, *et al*. Attributes and predictors of long COVID.  
607 *Nature Medicine* 2021; **Mar 10**. DOI:10.1038/s41591-021-01292-y.
- 608 4 Li B, Zhang S, Zhang R, Chen X, Wang Y, Zhu C. Epidemiological and Clinical  
609 Characteristics of COVID-19 in Children: A Systematic Review and Meta-Analysis.  
610 *Frontiers in Pediatrics*. 2020; **8**. DOI:10.3389/fped.2020.591132.
- 611 5 Ma N, Li P, Wang X, *et al*. Ocular Manifestations and Clinical Characteristics of  
612 Children with Laboratory-Confirmed COVID-19 in Wuhan, China. *JAMA*  
613 *Ophthalmology* 2020; **138**. DOI:10.1001/jamaophthalmol.2020.3690.
- 614 6 National Health Service (NHS). COVID-19 Hospital Activity. 2021.  
615 <https://www.england.nhs.uk/statistics/statistical-work-areas/covid-19-hospital-activity/>.
- 616 7 Bhopal SS, Bagaria J, Olabi B, Bhopal R. Children and young people remain at low  
617 risk of COVID-19 mortality. *Lancet Child Adolesc Health* 2021; **Mar 11**: S2352-  
618 4642(21)00066-3. [https://doi.org/10.1016/S2352-4642\(21\)00066-3](https://doi.org/10.1016/S2352-4642(21)00066-3)
- 619 8 Godfred-Cato S, Bryant B, Leung J, *et al*. COVID-19-Associated Multisystem  
620 Inflammatory Syndrome in Children - United States, March-July 2020. *MMWR Morb*  
621 *Mortal Wkly Rep*; **69**: 1074–80. <http://dx.doi.org/10.15585/mmwr.mm6932e2>
- 622 9 Nalbandian A, Sehgal K, Gupta A, *et al*. Post-acute COVID-19 syndrome. *Nat Med*  
623 2021. DOI:10.1038/s41591-021-01283-z.
- 624 10 National Institute for Health and Care Excellence (NICE). COVID-19 rapid guideline:  
625 managing the long- term effects of COVID-19 (NG188). Evidence reviews 2 and 3:  
626 prevalence. 2020. <https://www.nice.org.uk/guidance/ng188> (accessed May 10, 2021).
- 627 11 Menni C, Valdes AM, Freidin MB, *et al*. Real-time tracking of self-reported symptoms  
628 to predict potential COVID-19. *Nature Medicine* 2020. DOI:10.1038/s41591-020-0916-  
629 2.
- 630 12 Varsavsky T, Graham MS, Canas LS, *et al*. Detecting COVID-19 infection hotspots in  
631 England using large-scale self-reported data from a mobile application: a prospective,  
632 observational study. *The Lancet Public Health* 2021; **6**. DOI:10.1016/S2468-  
633 2667(20)30269-3.
- 634 13 Government of the United Kingdom. Coronavirus (COVID-19) in the UK - Lab-based  
635 testing and capacity, by test type. 2021.  
636 <https://coronavirus.data.gov.uk/details/testing>.
- 637 14 Public Health England. Weekly national Influenza and COVID-19 surveillance report -  
638 Week 11 report (up to week 10 data) 18 March 2021. 2021.  
639 [https://assets.publishing.service.gov.uk/government/uploads/system/uploads/attachm  
640 ent\\_data/file/971212/Weekly\\_Flu\\_and\\_COVID-19\\_report\\_w11\\_v2.pdf](https://assets.publishing.service.gov.uk/government/uploads/system/uploads/attachment_data/file/971212/Weekly_Flu_and_COVID-19_report_w11_v2.pdf) (accessed April  
641 27, 2021).
- 642 15 Government of the United Kingdom. GOV.UK Coronavirus (COVID-19) in the UK -  
643 Cases by specimen date. 2021. <https://coronavirus.data.gov.uk/details/cases>

- 644 16 Struyf T, Deeks JJ, Dinnes J, *et al.* Signs and symptoms to determine if a patient  
645 presenting in primary care or hospital outpatient settings has COVID-19. *Cochrane*  
646 *Database of Systematic Reviews*. 2021; **2021**.  
647 DOI:10.1002/14651858.CD013665.pub2.
- 648 17 Kumar L, Kahlon N, Jain A, Kaur J, Singh M, Pandey AK. Loss of smell and taste in  
649 COVID-19 infection in adolescents. *International Journal of Pediatric*  
650 *Otorhinolaryngology* 2021; **142**. DOI:10.1016/j.ijporl.2021.110626.
- 651 18 Carfi A, Bernabei R, Landi F. Persistent symptoms in patients after acute COVID-19.  
652 *JAMA - Journal of the American Medical Association*. 2020; **324**.  
653 DOI:10.1001/jama.2020.12603.
- 654 19 Townsend L, Dyer AH, Jones K, *et al.* Persistent fatigue following SARS-CoV-2  
655 infection is common and independent of severity of initial infection. *PLoS ONE* 2020;  
656 **15**. DOI:10.1371/journal.pone.0240784.
- 657 20 Abu-Arafeh I, Razak S, Sivaraman B, Graham C. Prevalence of headache and  
658 migraine in children and adolescents: A systematic review of population-based  
659 studies. *Developmental Medicine and Child Neurology*. 2010; **52**. DOI:10.1111/j.1469-  
660 8749.2010.03793.x.
- 661 21 Abu-Arafeh I, Russell G. Prevalence of headache and migraine in schoolchildren.  
662 *BMJ* 1994; **309**. DOI:10.1136/bmj.309.6957.765.
- 663 22 Farmer A, Fowler T, Scourfield J, Thapar A. Prevalence of chronic disabling fatigue in  
664 children and adolescents. *British Journal of Psychiatry*. 2004; **184**.  
665 DOI:10.1192/bjp.184.6.477.
- 666 23 Crawley EM, Emond AM, Sterne JAC. Unidentified chronic fatigue syndrome/myalgic  
667 encephalomyelitis (CFS/ME) is a major cause of school absence: Surveillance  
668 outcomes from school-based clinics. *BMJ Open* 2011; **1**. DOI:10.1136/bmjopen-2011-  
669 000252.
- 670 24 Norris T, Collin SM, Tilling K, *et al.* Natural course of chronic fatigue  
671 syndrome/myalgic encephalomyelitis in adolescents. *Archives of Disease in*  
672 *Childhood* 2017; **102**. DOI:10.1136/archdischild-2016-311198.
- 673 25 Balfour HH, Odumade OA, Schmeling DO, *et al.* Behavioral, virologic, and  
674 immunologic factors associated with acquisition and severity of primary epstein-barr  
675 virus infection in university students. *Journal of Infectious Diseases* 2013; **207**.  
676 DOI:10.1093/infdis/jis646.
- 677 26 Duarte-Salles T, Vizcaya D, Pistillo A, *et al.* Baseline characteristics, management,  
678 and outcomes of 55,270 children and adolescents diagnosed with COVID-19 and  
679 1,952,693 with influenza in France, Germany, Spain, South Korea and the United  
680 States: An international network cohort study. *medRxiv*. 2020.  
681 DOI:10.1101/2020.10.29.20222083.
- 682 27 UK Office for National Statistics (ONS), Steel K, Davies B. 5. Test sensitivity and  
683 Specificity. 2021.  
684 [https://www.ons.gov.uk/peoplepopulationandcommunity/healthandsocialcare/conditio](https://www.ons.gov.uk/peoplepopulationandcommunity/healthandsocialcare/conditionsanddiseases/methodologies/covid19infectionsurveyypilotmethodsandfurtherinformation#test-sensitivity-and-specificity)  
685 [nsanddiseases/methodologies/covid19infectionsurveyypilotmethodsandfurtherinformati](https://www.ons.gov.uk/peoplepopulationandcommunity/healthandsocialcare/conditionsanddiseases/methodologies/covid19infectionsurveyypilotmethodsandfurtherinformation#test-sensitivity-and-specificity)  
686 [on#test-sensitivity-and-specificity](https://www.ons.gov.uk/peoplepopulationandcommunity/healthandsocialcare/conditionsanddiseases/methodologies/covid19infectionsurveyypilotmethodsandfurtherinformation#test-sensitivity-and-specificity).
- 687 28 Public Health Scotland. Weekly national seasonal respiratory report - Week ending 28  
688 March 2021 – week 12. [https://beta.isdscotland.org/media/8300/week-12-respiratory-](https://beta.isdscotland.org/media/8300/week-12-respiratory-report-full-report-final.pdf)  
689 [report-full-report-final.pdf](https://beta.isdscotland.org/media/8300/week-12-respiratory-report-full-report-final.pdf). 2021; published online March 31.

- 690 29 Public Health Wales - National Health Service. Weekly Influenza Activity in Wales  
691 Report. <http://www.wales.nhs.uk/sites3/page.cfm?orgid=457&pid=34338>. 2021;  
692 published online April 7.
- 693 30 Ludvigsson JF. Case report and systematic review suggest that children may  
694 experience similar long-term effects to adults after clinical COVID-19. *Acta*  
695 *Paediatrica, International Journal of Paediatrics* 2021; **110**. DOI:10.1111/apa.15673.
- 696 31 UK Office for National Statistics (ONS) ER. Young people's well-being in the UK:  
697 2020.  
698 [https://www.ons.gov.uk/peoplepopulationandcommunity/wellbeing/bulletins/youngpeo](https://www.ons.gov.uk/peoplepopulationandcommunity/wellbeing/bulletins/youngpeopleswellbeingintheuk/2020)  
699 [pleswellbeingintheuk/2020](https://www.ons.gov.uk/peoplepopulationandcommunity/wellbeing/bulletins/youngpeopleswellbeingintheuk/2020). 2020; published online Oct 2.
- 700 32 Hysing M, Elgen I, Gillberg C, Lie SA, Lundervold AJ. Chronic physical illness and  
701 mental health in children. Results from a large-scale population study. *Journal of Child*  
702 *Psychology and Psychiatry and Allied Disciplines* 2007; **48**. DOI:10.1111/j.1469-  
703 7610.2007.01755.x.
- 704 33 UK Office for National Statistics (ONS). COVID-19 Schools Infection Survey Round 2,  
705 England: December 2020. 2021.  
706 [https://www.ons.gov.uk/peoplepopulationandcommunity/healthandsocialcare/conditio](https://www.ons.gov.uk/peoplepopulationandcommunity/healthandsocialcare/conditionsanddiseases/bulletins/covid19schoolsinfectionsurveyround2england/december2020)  
707 [nsanddiseases/bulletins/covid19schoolsinfectionsurveyround2england/december2020](https://www.ons.gov.uk/peoplepopulationandcommunity/healthandsocialcare/conditionsanddiseases/bulletins/covid19schoolsinfectionsurveyround2england/december2020)  
708 .
- 709 34 UK Office for National Statistics (ONS). All data related to Prevalence of ongoing  
710 symptoms following coronavirus (COVID-19) infection in the UK: 1 April 2021.  
711 [https://www.ons.gov.uk/peoplepopulationandcommunity/healthandsocialcare/conditio](https://www.ons.gov.uk/peoplepopulationandcommunity/healthandsocialcare/conditionsanddiseases/bulletins/prevalenceofongoingsymptomsfollowingcoronaviruscovid19infectionintheuk/1april2021/relateddata)  
712 [nsanddiseases/bulletins/prevalenceofongoingsymptomsfollowingcoronaviruscovid19in](https://www.ons.gov.uk/peoplepopulationandcommunity/healthandsocialcare/conditionsanddiseases/bulletins/prevalenceofongoingsymptomsfollowingcoronaviruscovid19infectionintheuk/1april2021/relateddata)  
713 [fectionintheuk/1april2021/relateddata](https://www.ons.gov.uk/peoplepopulationandcommunity/healthandsocialcare/conditionsanddiseases/bulletins/prevalenceofongoingsymptomsfollowingcoronaviruscovid19infectionintheuk/1april2021/relateddata). 2021; published online April 1.
- 714 35 UK Office for National Statistics (ONS). Updated estimates of the prevalence of long  
715 COVID symptoms.  
716 [https://www.ons.gov.uk/peoplepopulationandcommunity/healthandsocialcare/healthan](https://www.ons.gov.uk/peoplepopulationandcommunity/healthandsocialcare/healthandlifeexpectancies/adhocs/12788updatedestimatesoftheprevalenceoflongcovidssymptoms)  
717 [dlifeexpectancies/adhocs/12788updatedestimatesoftheprevalenceoflongcovidssympto](https://www.ons.gov.uk/peoplepopulationandcommunity/healthandsocialcare/healthandlifeexpectancies/adhocs/12788updatedestimatesoftheprevalenceoflongcovidssymptoms)  
718 [ms](https://www.ons.gov.uk/peoplepopulationandcommunity/healthandsocialcare/healthandlifeexpectancies/adhocs/12788updatedestimatesoftheprevalenceoflongcovidssymptoms). 2021; published online Jan 21.
- 719 36 Say D, Crawford N, McNab S, Wurzel D, Steer A, Tosif S. Post-acute COVID-19  
720 outcomes in children with mild and asymptomatic disease. *The Lancet Child &*  
721 *Adolescent Health* 2021; published online April. DOI:10.1016/S2352-4642(21)00124-  
722 3.
- 723 37 Graham MS, May A, Varsavsky T, *et al*. Knowledge barriers in the symptomatic-  
724 COVID-19 testing programme in the UK: an observational study. *medRxiv* 2021.

725

**Table 1. Characteristics of school-aged children who tested positive for SARS-CoV-2, and the control cohort of children (matched 1:1 for age, gender, and week of testing) who tested negative for SARS-CoV-2.** The cohort of children with positive SARS-CoV-2 testing is presented here both as younger and older groups; and for usual (i.e., short) vs. extended illness duration.

|                                               | Children with positive SARS-CoV-2 test |                  |                           |                            |                  | Children with negative SARS-CoV-2 test (matched cohort) |
|-----------------------------------------------|----------------------------------------|------------------|---------------------------|----------------------------|------------------|---------------------------------------------------------|
|                                               | Younger group                          | Older group      | Symptom duration <10 days | Symptom duration ≥ 28 days | Full cohort      |                                                         |
| <b>Number</b>                                 | 588                                    | 1,146            | 1,183                     | 77                         | 1,734            | 1,734                                                   |
| <b>Males (%)</b>                              | 287 (48.9)                             | 577 (50.3)       | 618 (52.2)                | 35 (45.5)                  | 864 (49.8)       | 865 (49.9)                                              |
| <b>Age, years (median, [IQR])</b>             | 9 [7;10]                               | 15 [13;16]       | 13 [10;15]                | 14 [12;16]                 | 13 [10;15]       | 13 [10;15]                                              |
| <b>BMI (kg/m<sup>2</sup>) (median, [IQR])</b> | 17.0 [15.1;19.7]                       | 20.1 [17.8;22.3] | 19.0 [16.5;21.8]          | 18.6 [16.3;21.8]           | 19.2 [16.6;21.8] | 19.0 [16.5;21.5]                                        |
| <b>Asthma (%)</b>                             | 69 (11.7)                              | 147 (12.8)       | 134 (11.7)                | 10 (13.0)                  | 216 (12.8)       | 229 (13.2)                                              |
| <b>Visit to hospital (%)</b>                  | 16 (2.7)                               | 21 (1.8)         | 20 (1.7)                  | 1 (1.3)                    | 37 (2.1)         | 26 (1.5)                                                |

|                                                             |         |          |         |            |          |         |
|-------------------------------------------------------------|---------|----------|---------|------------|----------|---------|
| <b>Illness duration (median, [IQR])</b>                     | 5 [2;9] | 7 [3;12] | 4 [2;6] | 46 [32;58] | 6 [3;11] | 3 [2;7] |
| <b>Number of symptoms in the first week (median, [IQR])</b> | 3 [2;5] | 4 [2;6]  | 3 [2;5] | 6 [4;8]    | 3 [2;6]  | 2 [1;4] |

BMI: Body Mass Index. IQR: Inter Quartile Range.

**Table 2. Symptoms over the duration of illness in children testing positive for SARS-CoV-2.**

|                  | Sample tested positive for SARS-CoV-2     |                                            |                          |
|------------------|-------------------------------------------|--------------------------------------------|--------------------------|
|                  | Younger children (aged 5-11 years, n=588) | Older children (aged 12-17 years, n=1,146) | Overall cohort (n=1,734) |
| Headache         | 324                                       | 755                                        | 1,079 (62.2%)            |
| Fatigue          | 258                                       | 696                                        | 954 (55.0%)              |
| Sore Throat      | 213                                       | 585                                        | 798 (46.0%)              |
| Anosmia          | 132                                       | 554                                        | 686 (39.6%)              |
| Fever            | 257                                       | 396                                        | 653 (37.7%)              |
| Abdominal Pain   | 163                                       | 194                                        | 357 (20.6%)              |
| Dizziness        | 84                                        | 300                                        | 384 (22.1%)              |
| Persistent Cough | 145                                       | 298                                        | 443 (25.5%)              |
| Loss of Appetite | 120                                       | 254                                        | 374 (21.6%)              |
| Eye Soreness     | 89                                        | 248                                        | 337 (19.4%)              |
| Myalgias         | 54                                        | 231                                        | 285 (16.4%)              |
| Nausea           | 95                                        | 193                                        | 288 (16.6%)              |
| Hoarse voice     | 63                                        | 166                                        | 229 (13.2%)              |
| Chest Pain       | 37                                        | 143                                        | 180 (10.4%)              |
| Dyspnoea         | 24                                        | 143                                        | 167 (9.6%)               |
| Diarrhoea        | 48                                        | 79                                         | 127 (7.3%)               |
| Confusion        | 15                                        | 81                                         | 96 (5.5%)                |
| Red Welts        | 16                                        | 36                                         | 52 (3.0%)                |
| Blisters         | 4                                         | 22                                         | 26 (1.5%)                |



### **Figure 1. Flowchart of Inclusion and Exclusion Criteria for the Study.**

Legend: overall number for the entire cohort of children is given first; numbers within brackets separated by oblique refer to younger children and older children in that order. 'Not valid result' – PCR test result proxy-reported as "failed test" or "still waiting". 'Duration calculable' – illness onset within defined timeframe of testing for SARS-CoV-2, and with defined endpoint (for details, please see Methods). 'Irregular logging' – proxy-reporting with intervals of >7 days between proxy-reports during illness duration). 'Illness onset outside of study bounds' - symptom onset before 1 September 2020 or after 24 January 2021. 'Hosp' – presenting to hospital (either admitted to hospital or seen in Emergency Department).

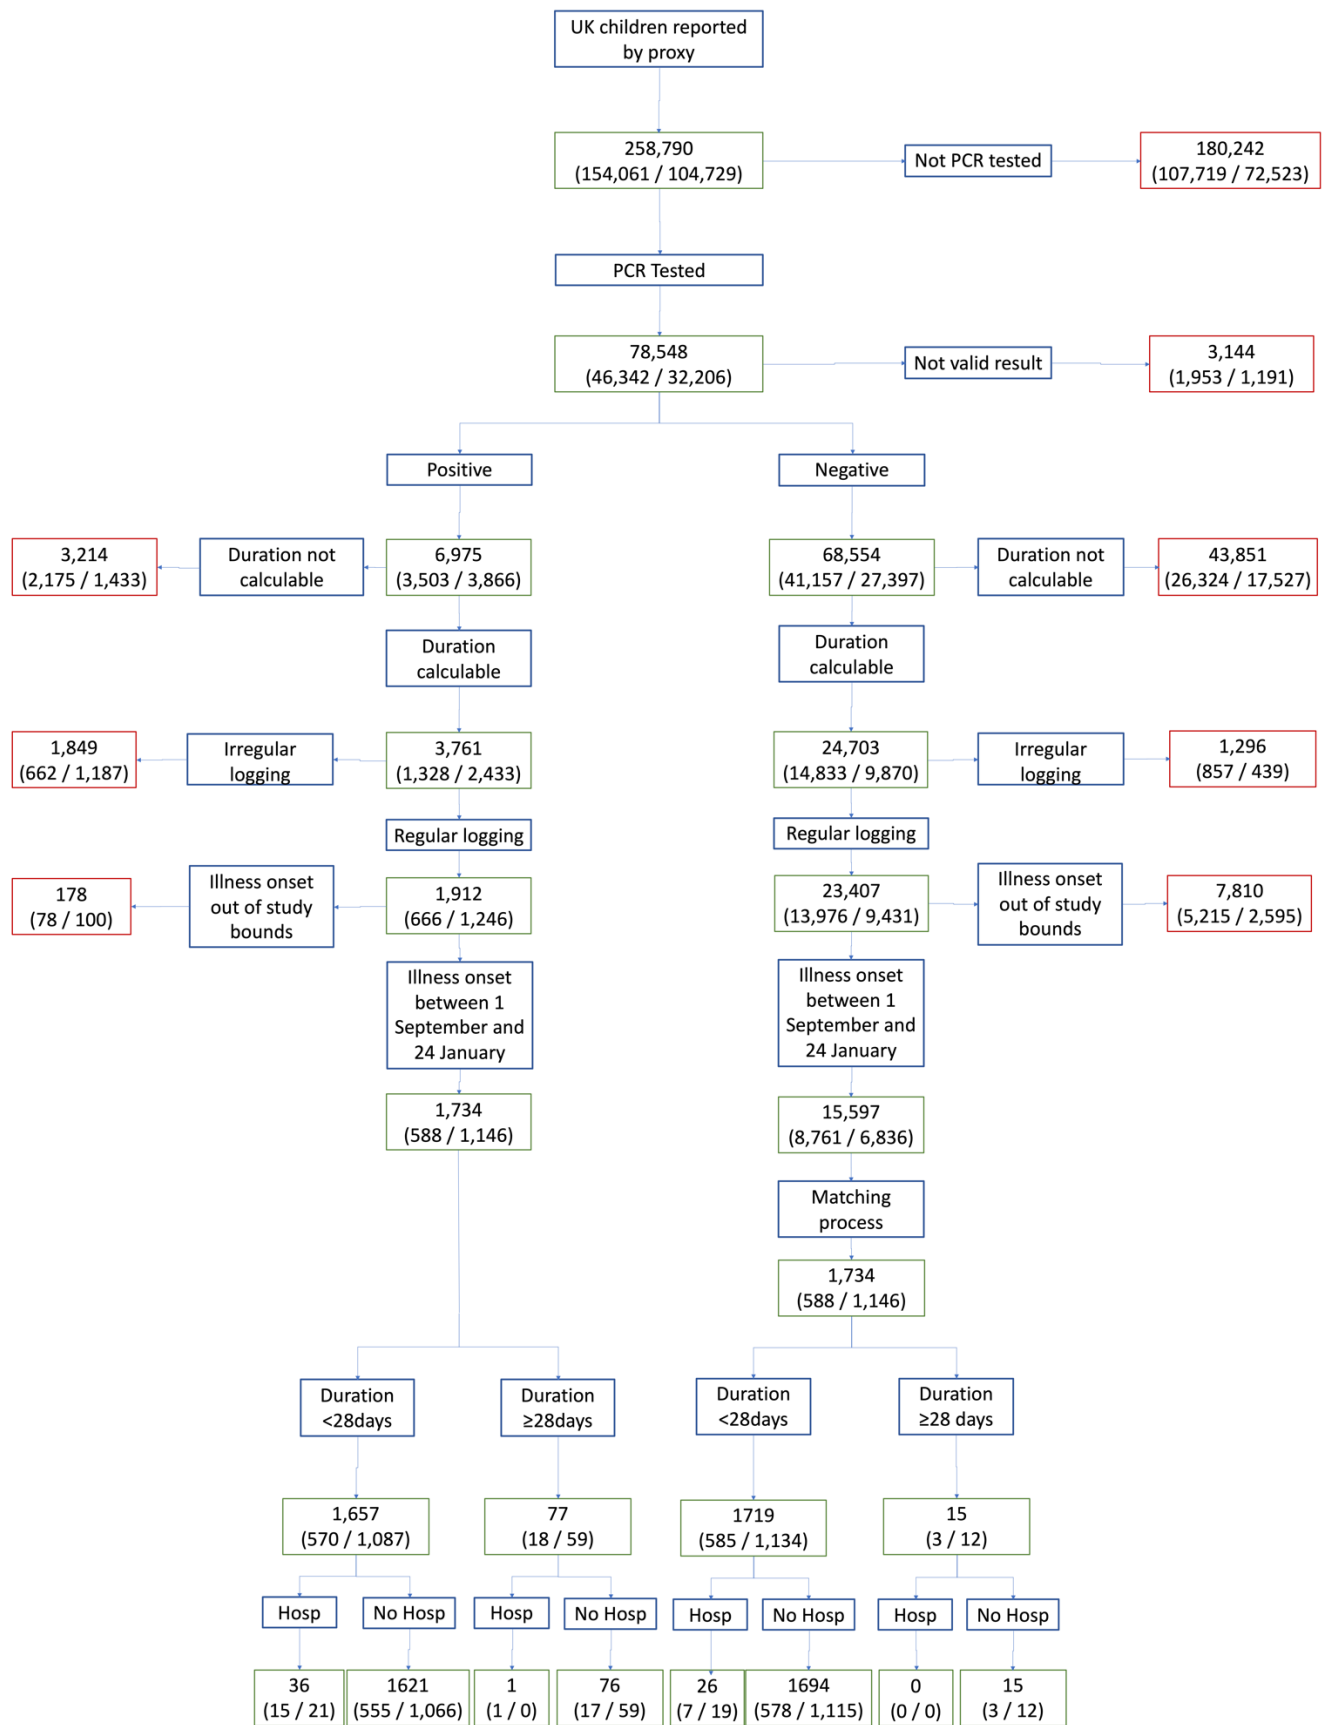

**Figure 2. Prevalence of symptoms reported over the course of illness in younger (5-11 years, n=588) and older (12-17 years, n=1,146) children testing positive for SARS-CoV-2.**

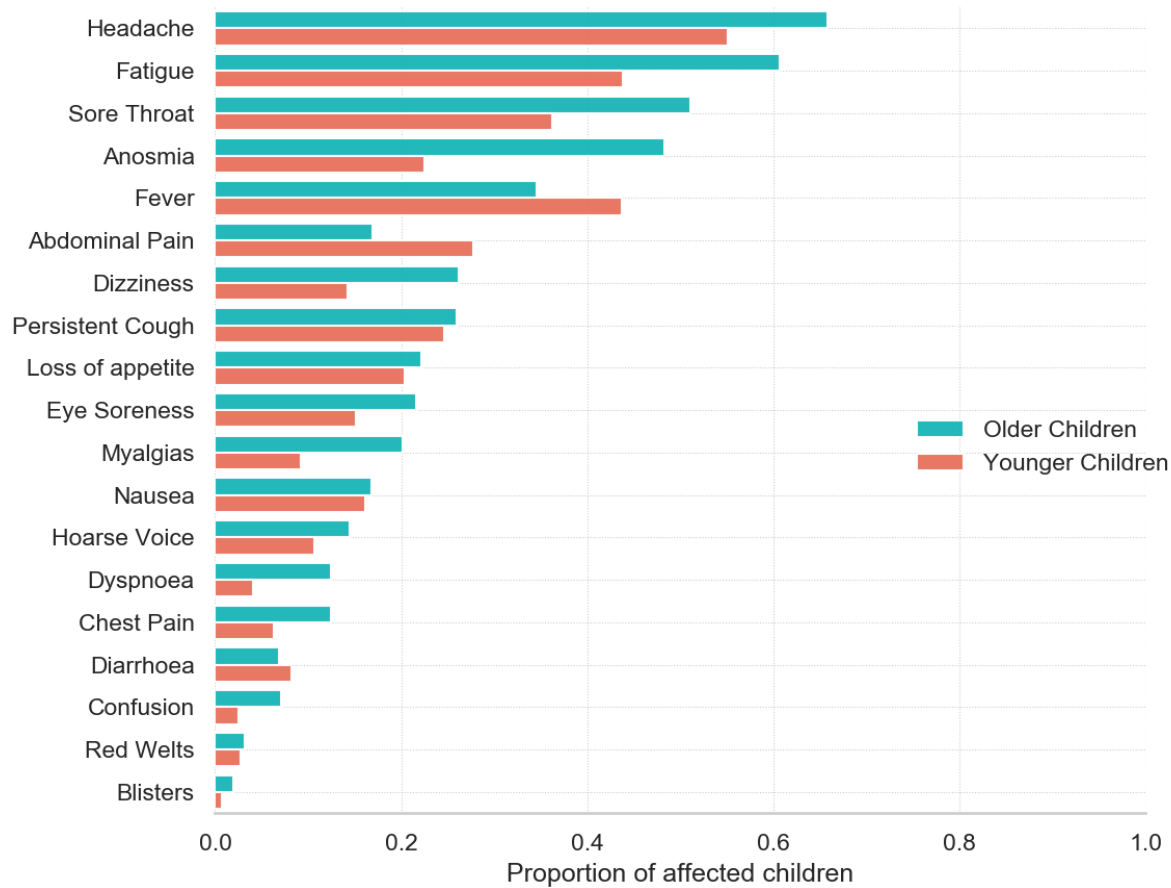

**Figure 3. Median duration of each symptom [IQR] in younger (5-11 years) and older (12-17 years) children.**

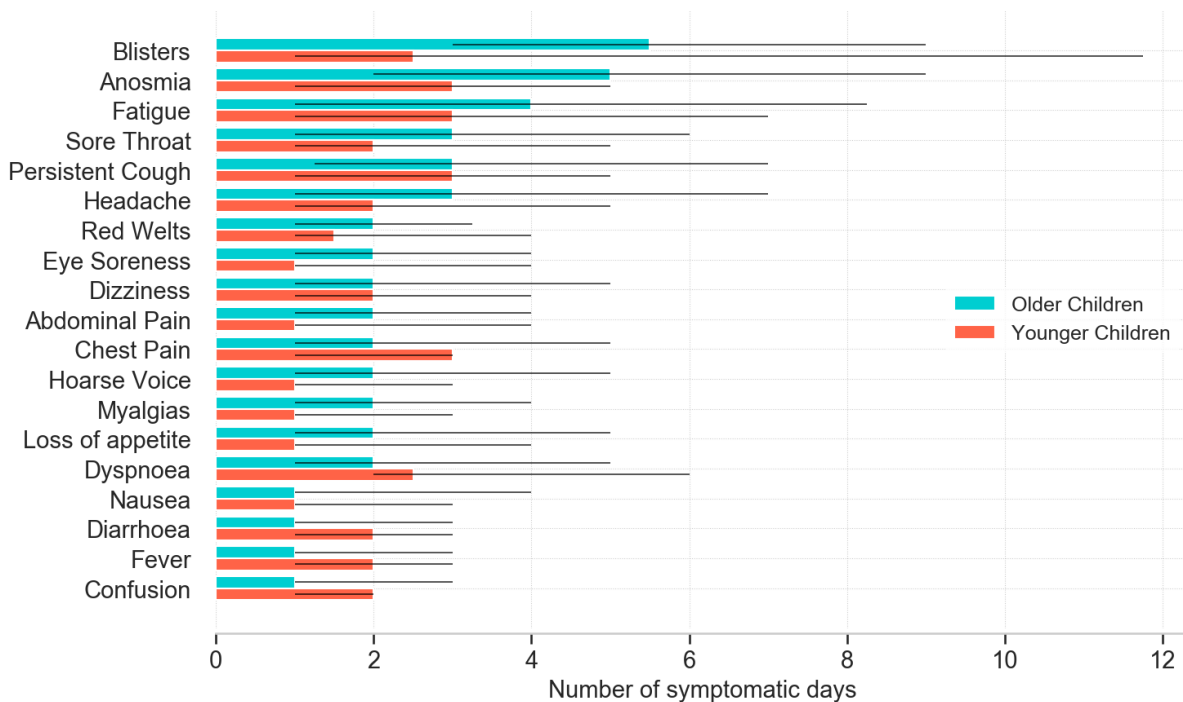

Source: https://medrxiv.org/content/medrxiv/early/2021/05/13/2021.05.05.21256649.full.pdf
